# Supplementary material for: Analysing researchers’ outreach efforts and the association with publication metrics: A case study of Kudos
Source: PLOS journal article supplement (doi:10.1371/journal.pone.0183217), 2017-08-17
Supplement: S10 (10.1371/journal.pone.0183217.s010) [file journal.pone.0183217.s010]

|                            | Sharing on Other channels |              |          |
|----------------------------|---------------------------|--------------|----------|
|                            | Yes                       | No           | <i>p</i> |
| <b>Professionals</b>       | 112 (22.1%)               | 394 (77.9%)  | <.01     |
| <b>Students</b>            | 42 (16.4%)                | 214 (83.6%)  |          |
| <b>Researchers</b>         | 81 (11.8%)                | 608 (88.2%)  |          |
| <b>Faculty</b>             | 326 (13.5%)               | 2094 (86.5%) |          |
| <b>Other career levels</b> | 25* (10.4%)               | 216 (89.6%)  |          |
