# Supplementary material for: Analysing researchers’ outreach efforts and the association with publication metrics: A case study of Kudos
Source: PLOS journal article supplement (doi:10.1371/journal.pone.0183217), 2017-08-17
Supplement: S12 (10.1371/journal.pone.0183217.s012) [file journal.pone.0183217.s012]

|                                    | Sharing on Twitter |             |          |
|------------------------------------|--------------------|-------------|----------|
|                                    | Yes                | No          | <i>p</i> |
| <b>Natural Sciences</b>            | 511 (48.9%)        | 534 (51.1%) | <.01     |
| <b>Engineering and Technology</b>  | 214 (36.3%)        | 376 (63.7%) |          |
| <b>Medical and Health Sciences</b> | 301 (39.7%)        | 458 (60.3%) |          |
| <b>Agricultural Sciences</b>       | 33* (50.8%)        | 32* (49.2%) |          |
| <b>Social Sciences</b>             | 581 (50.7%)        | 566 (49.3%) |          |
| <b>Humanities</b>                  | 117 (38.5%)        | 187 (61.5%) |          |
| <b>Other disciplines</b>           | 33* (32.4%)        | 69 (67.6%)  |          |
